# Supplementary material for: Supportive and non-supportive social experiences following suicide loss: a qualitative study
Source: Springer Nature journal article supplement (doi:10.1186/s12889-024-18545-3), 2024-04-27
Supplement: MOESM1 [file 27027410]

Interview guide section: **SLS' social experiences within their broader social environments**

| theme                                      | question                                                                                                                                                                                                                                                                                                                                                                                                                                                                                                                                                                                                                                                                                                                                                                                                                                                                                                                                                                                                                                                                                                                                                                                                                                                                                                                                                                                                                                                                                                                                                                         |
|--------------------------------------------|----------------------------------------------------------------------------------------------------------------------------------------------------------------------------------------------------------------------------------------------------------------------------------------------------------------------------------------------------------------------------------------------------------------------------------------------------------------------------------------------------------------------------------------------------------------------------------------------------------------------------------------------------------------------------------------------------------------------------------------------------------------------------------------------------------------------------------------------------------------------------------------------------------------------------------------------------------------------------------------------------------------------------------------------------------------------------------------------------------------------------------------------------------------------------------------------------------------------------------------------------------------------------------------------------------------------------------------------------------------------------------------------------------------------------------------------------------------------------------------------------------------------------------------------------------------------------------|
| narrative prompt                           | Reflecting on the time following [name of deceased]'s passing, could you share with me how your wider circle, including acquaintances and more distant contacts, responded?                                                                                                                                                                                                                                                                                                                                                                                                                                                                                                                                                                                                                                                                                                                                                                                                                                                                                                                                                                                                                                                                                                                                                                                                                                                                                                                                                                                                      |
| social reactions, interactions, encounters | <p>How did they react upon hearing about [name of deceased]'s passing?</p> <ul style="list-style-type: none"><li>• Were most people in your wider circle aware of [name of deceased]'s passing before you told them, or did they find out from you?</li><li>• Were there any reactions or encounters, positive or negative, that particularly stand out to you?</li><li>• Were there any interactions or responses that felt particularly hurtful or insensitive to you? Could you describe a specific instance that stands out and how it affected you?</li><li>• Were there any moments of kindness or support that particularly touched you or brought you comfort? Could you share a specific encounter or gesture that made a significant positive impact on you?</li></ul> <p>Can you tell me about the ways you coped with or responded to the range of reactions from your social circles?</p> <ul style="list-style-type: none"><li>• How did specific reactions you received impact your feelings and your grieving process?</li><li>• Were there any aspects you found particularly challenging?</li><li>• Were there strategies or supports that you found particularly helpful?</li></ul> <p>Reflecting on the different reactions you encountered, do you have thoughts on why people reacted the way they did?</p> <ul style="list-style-type: none"><li>• Are there any factors you think influenced these reactions?</li></ul> <p><i>(Follow-up questions about other social contexts, such as workplace, neighborhood, club, friends of the deceased.)</i></p> |

---

|                                       |                                                                                                                                                                                                                                                                                                                                                                                                                                                                                                                                                                                                                                                                                                                                                                                                                                                                             |
|---------------------------------------|-----------------------------------------------------------------------------------------------------------------------------------------------------------------------------------------------------------------------------------------------------------------------------------------------------------------------------------------------------------------------------------------------------------------------------------------------------------------------------------------------------------------------------------------------------------------------------------------------------------------------------------------------------------------------------------------------------------------------------------------------------------------------------------------------------------------------------------------------------------------------------|
| changes within the social environment | <p>Since [name of deceased]'s passing, have you noticed any shifts in your relationships with people around you?</p> <ul style="list-style-type: none"><li>• Could you share how some relationships may have grown stronger or become more distant?</li><li>• What do you think influenced these changes?</li></ul> <p>In your interactions with new acquaintances since the loss, how, if at all, does the topic of your loss come into conversation?</p> <ul style="list-style-type: none"><li>• What has been your experience in navigating these conversations?</li></ul> <p>Have you observed any differences in reactions or interactions based on whether people were aware of the cause of [name of deceased]'s passing?</p> <ul style="list-style-type: none"><li>• How did these differences manifest, and what are your thoughts on why they occurred?</li></ul> |
|---------------------------------------|-----------------------------------------------------------------------------------------------------------------------------------------------------------------------------------------------------------------------------------------------------------------------------------------------------------------------------------------------------------------------------------------------------------------------------------------------------------------------------------------------------------------------------------------------------------------------------------------------------------------------------------------------------------------------------------------------------------------------------------------------------------------------------------------------------------------------------------------------------------------------------|

---
